1 Running head: diversity-invasibility and soil biota

2

3 **Title: Evidence for Elton's diversity-invasibility hypothesis from belowground**

4

5 Zhijie Zhang<sup>1</sup>, Yanjie Liu<sup>2\*</sup>, Caroline Brunel<sup>3</sup>, Mark van Kleunen<sup>1,3</sup>

6 <sup>1</sup>Ecology, Department of Biology, University of Konstanz, 78464 Konstanz, Germany

7 <sup>2</sup>Key Laboratory of Wetland Ecology and Environment, Northeast Institute of Geography and

8 Agroecology, Chinese Academy Sciences, Changchun 130102, China

9 <sup>3</sup>Zhejiang Provincial Key Laboratory of Plant Evolutionary Ecology and Conservation,

10 Taizhou University, Taizhou 318000, China

11

12 \*Email of corresponding author: liuyanjie@iga.ac.cn +86 431 82536096

13

14 **Abstract**

15 Sixty year ago, Elton proposed that diverse communities are more resistant to biological  
16 invasion. However, still little is known about which processes could drive this diversity-  
17 invasibility relationship. Here we examined whether plant-soil feedback on alien invaders is  
18 more negative when the soil originates from multiple native species. We trained soils with  
19 five individually grown native species, and used amplicon sequencing to analyze the resulting  
20 bacterial and fungal soil communities. We mixed the soils to create trained soils from one,  
21 two or four native species. We then grew four alien species separately on these differently  
22 trained soils. In the soil-conditioning phase, the five native species built species-specific  
23 bacterial and fungal communities in their rhizospheres. In the test phase, it did not matter  
24 whether the soil had been trained by one or two native species. However, the alien species  
25 achieved 11.7% less aboveground biomass when grown on soils trained by four native  
26 species than on soils trained by two native species. Our results showed for the first time, that  
27 plant-soil feedback could be a process that contributes to the negative relationship between  
28 diversity and invasibility.

29 **Keywords:** diversity, invasibility, native species, pathogens, plant-soil feedback, plant  
30 invasion, soil biota, soil mixture

## 31 **Introduction**

32 In the last centuries, most regions of the world have been invaded by alien organisms  
33 (Dawson et al. 2017), and these invasions are still increasing (Pyšek et al. 2017, Seebens et  
34 al. 2018). The increasing numbers of naturalized alien species have stimulated discussion on  
35 how to increase community resistance to biological invasion. Elton (1958) proposed that  
36 diverse communities are more resistant to biological invasion. Support for Elton's diversity-  
37 invasibility hypothesis has arisen from experiments, particularly on plants (Levine 2000,  
38 Levine et al. 2004). Most of them focused on the relationship between diversity-invasibility,  
39 but not on the underlying mechanism. Theoretical models usually ascribed this relationship to  
40 a lack of available resources in diverse communities (Case 1990, Byers and Noonburg 2003),  
41 likely because Elton (1958) introduced his hypothesis with several examples where resource  
42 competition was likely to determine invasibility. However, as already acknowledged by Elton  
43 (1958), resource competition is not the only determinant of invasibility. Other processes, such  
44 as plant-soil feedback, could also affect invasions (Klironomos 2002, Dawson et al. 2016),  
45 and could potentially drive the relationship between diversity and invasibility.

46 Plant-soil feedback refers to the process where plants influence the soil environment,  
47 particularly the soil biota, through inputs of organic matter and other chemical compounds,  
48 which influence performance of the plants that later grow on the same soil (Bever et al. 1997,  
49 Bennett and Klironomos 2019). In the last two decades, numerous studies have tested how  
50 single species affect growth of later plants through plant-soil feedback (Kulmatiski et al.  
51 2008). However, only few studies tested how mixtures of multiple plant species affect later  
52 plants through plant-soil feedback (but see Müller *et al.*, 2015; Robin *et al.*, 2018 for how  
53 plant communities affects later plants). This is surprising, given that natural plant  
54 communities typically consist of multiple intermingled species. Consequently, we know little

55 about whether diverse plant communities better resist later plants through plant-soil feedback  
56 than less-diverse communities do.

57 Several hypotheses offer insights into how plant-soil feedback could affect the diversity-  
58 invasibility relationship, but they predict different patterns. First, the amplification-effect  
59 hypothesis proposes that a diverse community of plant species harbors a greater diversity and  
60 abundance of pathogens (Hudson et al. 2006, Keesing et al. 2006). This increases the  
61 likelihood that some of those pathogens will negatively affect invaders. Following this logic,  
62 diverse communities should be better able to resist alien plants. Second, the dilution-effect  
63 hypothesis proposes that diverse communities reduce the abundance of high susceptible hosts  
64 (Schmidt and Ostfeld 2001, Ostfeld and Keesing 2012), and that this reduces the prevalence  
65 of pathogens. Following this logic, diverse communities should be less able to resist alien  
66 plants. Third, the enemy-release hypothesis proposes that alien plants are released from  
67 enemies, such as pathogens (Mitchell and Power 2003). Following this logic, even when the  
68 diversity of plant communities affects pathogens, it might not strongly affect resistance of the  
69 plant communities. Given the contrasting predictions, empirical tests are necessary to test  
70 whether and how plant-soil feedback contributes to the diversity-invasibility relationship.

71 Here, we conducted a plant-soil feedback experiment with five native plant species to  
72 condition the soils and four alien plant species to test the effects of the diversity of native  
73 species. All nine species are widespread in Germany and can be locally abundant. We first  
74 grew each of the five native species individually to train soils. We collected rhizosphere soil  
75 and used amplicon sequencing to analyze the bacterial and fungal soil communities. We then  
76 mixed soil samples from one, two or four native species, and grew one of the four alien  
77 species on the soil mixture. This procedure allowed us to test whether diversity of native  
78 species affects alien species through plant-soil feedback.

## 79 **Materials and Methods**

### 80 *Study species*

81 We conducted a greenhouse experiment in which we used five herbaceous species (*Dactylis*  
82 *glomerata*, *Leontodon autumnalis*, *Lotus corniculatus*, *Plantago media*, *Salvia pratensis*) that  
83 are native to Germany to condition the soil, and four alien herbs (*Epilobium ciliatum*, *Lolium*  
84 *multiflorum*, *Senecio inaequidens*, *Vicia villosa*) as test species. We used multiple aliens as  
85 test species to increase our ability to generalize the results (van Kleunen et al. 2014). The  
86 classification of the status of the nine species was based on the Floraweb database  
87 (Bundesamt für Naturschutz 2003). All species are widespread in Germany and can be locally  
88 abundant. So, the four alien species can be classified as naturalized (and probably invasive;  
89 *sensu* Richardson *et al.*, 2000) in Germany. The nine species mainly occur in grasslands and  
90 overlap in their distributions (Bundesamt für Naturschutz 2003), so that they are likely to co-  
91 occur in nature. Seeds of the native species were obtained from Rieger-Hofmann GmbH  
92 (Blaufelden-Raboldshausen, Germany), and seeds of alien species were obtained from the  
93 Botanical Garden of the University of Konstanz.

### 94 *Experimental setup*

95 The experiment consisted of three steps. First, we had the soil-conditioning phase, in which  
96 we trained the soils by growing each of the five native species individually on the soils. Then  
97 we collected soil samples from the soil-conditioning phase, and created different soil-mixture  
98 treatments. These treatments were soil mixtures trained by one species, two species or four  
99 species. Finally, in the test phase, we grew one of the four alien species individually on the  
100 soil mixture and determined its biomass production. Details on each of these steps are given  
101 below.

102 *Soil-conditioning phase*

103 On 18 or 27 June 2018, we sowed seeds of the five native species into trays (10cm × 10cm ×  
104 5cm) filled with potting soil (Topferde<sup>®</sup>, Einheitserde Co., Sinntal-Altengronau, Germany).  
105 The soil and seeds were not sterilized. Because we wanted the different species to be in  
106 similar developmental stages at the beginning of the experiment, we sowed the species at  
107 different times (Table S1), according to their germination speed known from previous  
108 experiments. We then placed the trays with seeds in a greenhouse under natural light  
109 condition, with a temperature between 18 and 25°C.

110 On 9 July 2018, we transplanted for each of the five species 140 seedlings individually  
111 into 1.5-L pots filled with 25% field soil, 37.5% nonsterilized sand and 37.5% nonsterilized  
112 vermiculate. The field soil, served as inoculum to provide a live soil biotic community, and  
113 had been collected from a grassland site in the Botanical Garden of the University of  
114 Konstanz (47.69°N, 9.18°E). The soil had been sieved through a 1cm mesh to remove plant  
115 material and large stones. We placed each of the 700 pots on its own plastic dish to preserve  
116 water and to avoid cross-contamination through soil solutions leaking from the pots. We  
117 replaced seedlings that died within two weeks after transplanting by new ones. The pots were  
118 randomly allocated to positions in four greenhouse compartments (23°C/18°C day/night  
119 temperature, no additional light), fertilized with an NPK water soluble fertilizer (Universol  
120 Blue<sup>®</sup>, Everris, Nordhorn, Germany) at a concentration of 1‰ m/v seven times (100ml  
121 fertilizer per pot per time), watered as needed, and randomized twice.

122 From 22 to 26 October 2018, we harvested soils from each pot by first cutting the shoot  
123 and then removing the roots from the soil by sieving it through a 5-mm mesh. We randomly  
124 selected 120 pots of soil for each of the five species (600 pots in total), and used them to  
125 create the different soil-mixture treatments.

126 *Soil-mixture treatments*

127 To create a species-diversity gradient, we mixed soil samples from the soil-conditioning  
128 phase to create three treatment levels, which we call diversity-1, diversity-2 and diversity-4  
129 (Fig. 1). In the diversity-1 treatment, we collected 160 ml of soil from four different pots of  
130 the same species (40 ml from each pot). In the diversity-2 treatment, we collected 160 ml of  
131 soil from four different pots of two species (two pots per species). In the diversity-4  
132 treatment, we collected 160 ml of soil from four different pots of four species (one pot per  
133 species). Then, the 160 ml of soil was mixed with 220 ml nonsterilized sand and 220 ml  
134 nonsterilized vermiculite, and put into 0.6-L pots, which were then used in the test phase  
135 described below. As we had a total of five native species in the soil-conditioning phase, this  
136 resulted in five possible species or combinations for diversity-1 and for diversity 4, but ten  
137 possible combinations for diversity-2. To have equal numbers of combinations for each  
138 diversity treatment, we therefore used only five out of the ten possible combinations for  
139 diversity-2. We did this in such a way that each species was included in two of the five  
140 combinations. Consequently, we had five species or species combinations for each diversity  
141 treatment. Each of those combinations was replicated eight times, such that we had a total of  
142 120 pots for the test phase. Once we had collected soil from a pot of the soil conditioning  
143 phase, we did not use that pot again. This was done to avoid pseudoreplication (Hurlbert  
144 1984), because this way no two pots in the test phase shared soil from the same pot of the  
145 soil-conditioning phase (i.e. they were independent).

146 In the diversity-1 treatment, we used soil of one single plant species, and in the  
147 diversity-2 treatment, we used soil of two plant species. Nevertheless, we still collected the  
148 soil from four different pots, just like in the diversity-4 treatment. We did this because recent  
149 studies argued that the approach of mixing soil samples *per se* can affect plants by increasing

150 diversity of soil biota (Reinhart and Rinella 2016, Rinella and Reinhart 2018). More  
151 specifically, the composition of the soil biotic community can vary substantially across  
152 centimeters given their immense diversity (Decaëns 2010). So, microbes from different soil  
153 samples could differ in their identity, even when trained by the same plant species. This  
154 means that mixing soil samples might increase the diversity of mutualists and/or pathogens.  
155 Therefore, by consistently mixing soil samples from four pots for all diversity treatments, we  
156 reduced the potential side effects from soil mixing. In addition, we tested in a side experiment  
157 whether the mixing of soil samples from different individuals of the same species affects the  
158 strength of plant-soil feedback. We found no significant effect (Supplement S1), which  
159 indicates that the approach of mixing soil samples *per se* did not affect the relationship  
160 between diversity and invasibility.

#### 161 *Test phase*

162 Between 9 and 18 October 2018 (Table S1), we sowed the four alien species into trays filled  
163 with the same type of potting soil as in the soil conditioning phase. The soil and seeds were  
164 not sterilized. On 27 October 2018, we transplanted the seedlings into the 0.6-L pots prepared  
165 in the soil mixture phase. We assigned the seedlings in such a way that each alien species was  
166 replicated twice on each soil of a native species or native species combination (totaling 50  
167 pots per test species). We placed each of the 200 pots on its own plastic dish, and they were  
168 randomly allocated to position in a greenhouse compartment (20°C/15°C day/night  
169 temperature, 14 h/10 h day/night light). The plants were fertilized with a water soluble NPK  
170 fertilizer (Universol Blue<sup>®</sup>, Everris, Nordhorn, Germany) at a concentration of 1‰ m/v four  
171 times (100ml fertilizer per pot per time), and their positions were re-randomized once. By  
172 homogenizing the soils in the soil-mixture treatments, inoculating a small amount (26.7%  
173 v/v) of trained soil and fertilizing the plants throughout the experiment, we were likely to



174 remove plant-soil feedback differences due to abiotic properties. Therefore, any differences,  
175 if found, would be mainly due to differences in biotic properties of the soils. On 18 December  
176 2018, seven weeks after the start of the test phase, we harvested all aboveground plant parts,  
177 and then washed the roots free from soil. The biomass was dried at 70°C to constant weight,  
178 and weighed to the nearest milligram.

179 *Soil sampling, DNA extraction, amplicon sequencing and bioinformatics*

180 From 22 to 26 October 2018, when we harvested the trained soil, we randomly selected six  
181 pots for each of the five native species. For each of these pots, 10-20ml rhizosphere-soil was  
182 collected into sterile 50-ml cylindrical tube, and stored at -80°C until required for DNA  
183 extraction. We extracted DNA from 0.25g of each soil sample using the DNeasy®  
184 PowerSoil® Kit (Qiagen, Hilden, Germany), following the manufacturer's protocol.

185 PCR amplifications and amplicon sequencing were then performed by Novogene  
186 (Beijing China). In brief, V3-V4 region of bacterial 16S rDNA gene was amplified in  
187 triplicate with the universal primers 341F/806R (forward primer: 5'-  
188 CCTAYGGGRBGCASCAG-3'; reverse primer: 5'- GGACTACNNGGGTATCTAAT-  
189 3')(Klindworth et al. 2012). The ITS2 region of fungal rDNA gene was amplified in triplicate  
190 with the primers specific to this locus (forward primer: 5'-  
191 GCATCGATGAAGAACGCAGC-3'; reverse primer: 5'- TCCTCCGCTTATTGATATGC-  
192 3')(Orgiazzi et al. 2012). All PCR reactions were carried out with Phusion® High-Fidelity  
193 PCR Master Mix (New England Biolabs). PCR products were mixed in equidensity ratios.  
194 Then, mixtures of PCR products were purified with Gel Extraction Kit (Qiagen, Germany).  
195 The libraries were generated with NEBNext® Ultra™ DNA Library Prep Kit for Illumina  
196 and analyzed using the Illumina platform.

197 We processed the raw sequences with the *DADA2* pipeline (Callahan et al. 2016), which  
198 is designed to resolve exact biological sequences (Amplicon Sequence Variants [ASVs] or  
199 phylotypes) from Illumina sequence data and does not involve sequence clustering (Callahan  
200 et al. 2017). The detailed process was described in Brunel et al. (2019). In short, we removed  
201 primers and adapter with the *cutadapt* package (Martin 2011), merged paired-end sequences,  
202 and removed chimeras. Then, we determined taxonomy assignments against derivative  
203 reformatting of the UNITE (Nilsson et al. 2018) and the SILVA (Quast et al. 2013)  
204 taxonomic databases for fungi and bacteria, respectively. Last, we rarefied bacteria and fungi  
205 to 30,000 and 10,000 reads, respectively, to account for differences in sequencing depths.  
206 One sample that did not have enough reads for bacteria and two samples that did not have  
207 enough PCR product for fungi were excluded from soil analyses. Putative fungal functional  
208 groups (e.g. Arbuscular mycorrhiza fungi, plant pathogens and endophytes) were identified  
209 using FUNGuild (Nguyen et al. 2016).

### 210 *Statistical analyses*

211 To test whether plant-soil feedback on alien invaders is more negative when the soil  
212 originates from multiple native species, we used mixed effect models to analyze the biomass  
213 production of the alien plants, as implemented in the *nlme* package (Pinheiro et al. 2018) with  
214 R 3.4.0 (R Core Team 2017). This analysis was restricted to the subset of 120 plants that  
215 grew in pots inoculated with soil samples from four different pots of the conditioning phase  
216 (Fig. 1). The models included aboveground, belowground or total biomass as the response  
217 variables, and soil-diversity treatment (i.e. diversity-1, -2 and -4) as the fixed effect. The  
218 models included identity of the alien species and identity of the soil (i.e. identity of the native  
219 species for diversity-1, and identity of the species combination for diversity-2 and -4  
220 treatments) as random effects. Because initial data exploration showed that the effect of

221 diversity is nonlinear, we included soil-diversity as a categorical instead of as a continuous  
222 variable. To improve homoscedasticity of residuals, we allowed the alien species and soil-  
223 diversity treatments to have different variances by using the *varComb* and *varIdent* function  
224 (Zuur et al. 2009). We performed multiple pairwise comparisons with Tukey correction to  
225 test for differences among the three soil-diversity levels with the *multicomp* package  
226 (Hothorn et al. 2008).

227       To test whether the five native plant species differently trained the soil microbial  
228 communities, we analyzed whether alpha and beta diversities were related to plant species  
229 identity. As alpha diversities, we calculated both species richness and Shannon indexes,  
230 which were analyzed with linear models. The models included plant species identity as the  
231 explanatory variables. As the beta diversity, we calculated Bray–Curtis dissimilarities using  
232 reads relative abundances, which were analyzed with permutational analysis of variance  
233 (PERMANOVA), as implemented in the *adonis* function of the *vegan* package (Oksanen et  
234 al. 2019), again including plant species as explanatory variable. We used nonmetric  
235 multidimensional scaling (NMDS) to illustrate differences in the soil microbial communities  
236 of the plant species. We determined shared and unshared taxa among plant species (based on  
237 phylotypes occurring in at least one of the samples) and visualized them using 5 set-Venn  
238 diagrams with the *eulerr* package (Larsson 2018).

239

## 240 **Results**

### 241 *Microbial communities of trained soils*

242 We detected a total of 21,724 bacterial phylotypes and 1,231 fungal phylotypes. Identity of  
243 native plant species did not significantly explain Shannon diversity of (Table S4; Fig. S4) and  
244 variation in the composition of fungal communities (PERMANOVA,  $r^2 = 0.179$ ,  $F = 1.251$ ,  $p$   
245  $= 0.144$ , Fig. 2b). However, identity of native plant species marginally explained species  
246 richness of bacterial and fungal communities (Table S4; Fig. S4), and largely explained the  
247 variation in composition of bacterial communities (PERMANOVA,  $r^2 = 0.274$ ,  $F = 2.266$ ,  $p$   
248  $< 0.001$ , Fig. 2a). In addition, 55.1% of bacterial phylotypes and 61.4% of fungal phylotypes  
249 were not shared among native plant species (Fig. 3c&d). Fungal functional groups (i.e. AMF,  
250 plant pathogen and endophyte) could be assigned to 495 phylotypes, representing 34.0 % of  
251 ITS sequence reads. Of these phylotypes, 23 were identified as AMF, 103 as endophytes and  
252 136 as plant pathogens (54 phylotypes were identified as both plant pathogen and endophyte).  
253 Variation in composition of identified endophytes and plant fungal pathogens was not  
254 significantly explained by identity of the native plant species (endophyte: PERMANOVA,  $r^2$   
255  $= 0.172$ ,  $F = 1.194$ ,  $p = 0.234$ ; pathogen: PERMANOVA,  $r^2 = 0.166$ ,  $F = 1.143$ ,  $p = 0.177$ ;  
256 Fig. S5; for AMF we had insufficient data).

### 257 *Biomass of plants in the test phase*

258 Diversity of the native species used to create the soil inocula affected the aboveground  
259 biomass production of the alien plants significantly ( $\chi^2 = 7.956$ ,  $P = 0.019$ ; Table S2). The  
260 aboveground biomass of the alien plants was not significantly different between the diversity-  
261 1 and diversity-2 treatments (Fig. 3; diversity-2 vs diversity-1,  $z = 1.123$ ,  $P = 0.500$ ). In other  
262 words, it did not matter whether the soil inoculum came from one or two native species.  
263 However, the alien plants produced 11.7% less aboveground biomass in the diversity-4

264 treatment than in the diversity-2 treatment (Fig. 3; diversity-4 vs diversity-2,  $z = -2.964$ ,  $P =$   
265 0.008). Although the alien plants tended to achieve also less aboveground biomass (-7.26%)  
266 in the diversity-4 treatment than in the diversity-1 treatment (Fig. 3), the difference was not  
267 statistically significant (diversity-4 vs diversity-1;  $z = -1.638$ ,  $P = 0.230$ ). A similar pattern  
268 was found for total biomass, but there the effect of diversity-4 vs diversity-2 was marginally  
269 significant (Fig. S3a; diversity-4 vs diversity-2,  $z = -2.067$ ,  $P = 0.096$ ). Belowground biomass  
270 did not differ among the three diversity treatments (Fig. S3b; Table S2).

271

272

## 273 **Discussion**

274 We here show that alien plants achieved less aboveground biomass when grown on a mixture  
275 of soil trained by four native species than when grown on a mixture of soil trained by two  
276 native species. This suggests that diverse native communities could impede plant invasion  
277 through plant-soil feedback. So, whereas previous studies frequently ascribed the negative  
278 relationship between diversity and invasibility to resource competition (Byers and Noonburg  
279 2003), we showed for the first time that this relationship could also be driven by plant-soil  
280 feedback.

281 The negative effect of soil from diverse native communities on alien plants could be  
282 mediated by the establishment of a diverse community of soil pathogens during the  
283 conditioning phase. This is because we found that different native species built species-  
284 specific bacterial and fungal communities in their rhizospheres. Consequently, diverse plant  
285 communities harbored a greater diversity of soil microbiota, many of which might be plant  
286 pathogens with a particularly strong negative impact on the alien plant. This finding thus  
287 supports the amplification-effect hypothesis (Keesing et al. 2006), and does not support the  
288 predictions of the dilution-effect hypothesis (Schmidt and Ostfeld 2001, Ostfeld and Keesing  
289 2012) and the enemy-release hypothesis (Mitchell and Power 2003). One explanation for the  
290 latter could be that, although alien plants could escape from their co-evolved enemies (i.e.  
291 specialist enemies), they might still encounter biotic resistance from generalist enemies  
292 (Maron and Vilà 2001, Dawson et al. 2014, Zhang et al. 2018). This explanation becomes  
293 more plausible given that the dilution effect is less likely to happen when pathogens are  
294 generalists (Power and Mitchell 2004). Therefore, our finding that diverse communities are  
295 more resistant to biological invasion might be driven by generalist pathogens.

296           Although diverse native communities could suppress alien plant performance through  
297 plant-soil feedback, this effect was only significant when we compared the alien plants grown  
298 on soils trained by four native species with those grown on soils trained by two native  
299 species. The comparisons with plants grown on soils trained by only one native species (i.e.  
300 diversity-1 vs diversity-2, and diversity-1 vs diversity-4) were not significant. Probably, this  
301 is because at low diversity, the variation among native species in their effects on the alien  
302 species was large (see error bars of diversity-1 in Fig. 3), which limited the statistical power.  
303 Nevertheless, the alien plants on soil trained by four native species tended to produce less  
304 aboveground biomass than the alien plants grown on soil trained by one native species.  
305 Moreover, invasion is a probabilistic process (Crawley 1987, Levine and D'Antonio 1999),  
306 and the probability that a community includes native species that can impede alien plants  
307 increases with the diversity of the community. Such a so-called selection effect (Huston  
308 1997) is also indicated by the 14.9% higher variance in the diversity-1 treatment than  
309 diversity-2 and -4 treatments. If most native species do not strongly affect the alien plants, it  
310 will, however, be difficult to detect a diversity effect at low diversities. This could explain the  
311 absence of a difference in biomass production of aliens between the diversity-1 and diversity-  
312 2 treatments.

313           Unexpectedly, root biomass of alien plants did not change with diversity of native  
314 communities. As roots are in direct contact with soil, effects of plant-soil feedback are  
315 expected to first emerge in the roots and then subsequently affect the shoots. Possibly, roots  
316 in all diversity treatments were limited by pot size. Total plant biomass per unit pot volume  
317 was 1.45 g/L on average, which is lower than most pot experiments but higher than the  
318 threshold (1 g/L) where pot limitation starts to happen (Poorter et al. 2012). Alternatively, our  
319 finding may reflect that the alien plants have high phenotypic plasticity (Davidson et al.

2011), and changed their root-shoot allocation in such a way that they could maintain maximum root biomass under different conditions.

### 322 *Future directions*

323 Invasibility is defined as invasion growth rates of invaders, that is, population growth rates  
324 when the invader is introduced into native plant communities at low densities (Case 1990).  
325 Therefore, it will be more realistic and straightforward to include competition from native  
326 plants in the test phase. However, invasion growth rate can be decomposed into two parts  
327 (see Cardinaux, Hart & Alexander, 2018 for a mathematical expression): 1) intrinsic growth  
328 rate of the invader, i.e. growth rates when grown without competition; 2) competitive effect  
329 from the native community. As intrinsic growth rates of aliens decreased when soil were  
330 conditioned by four native species in our study, invasion growth rates of the aliens would  
331 decrease accordingly. Still, it remains an open question whether the competitive effect from  
332 the native community depends on the diversity of native species used to condition the soil.  
333 Besides, while Elton (1958) introduced the diversity-invasibility hypothesis with several  
334 examples on resource competition, he acknowledged that other processes, such as enemy-  
335 mediated apparent competition, can also determine invasibility. Because different processes  
336 can be correlated with diversity of native plants, testing multiple processes together will offer  
337 more insights.

338 We found that the diversity-4 treatment reduced biomass of alien species by 11.7%. It  
339 remains unknown whether this reduction is sufficient to eliminate the dominance of alien  
340 species over natives. Previous multispecies experiments offer us some clues. They showed  
341 that native species produced 13.6~38.3% less biomass than aliens (Godoy et al. 2011, Zhang  
342 and van Kleunen 2019). Therefore, the dominance of alien species over natives would be  
343 alleviated if native species are less limited by the negative soil feedback from diverse native



344 communities than aliens are. As we know little about whether native and alien species  
345 respond differently to soil feedback from diverse native communities, direct tests that include  
346 both alien and native species in the test phase are needed.

347 We measured the plants in their juvenile life stage. However, establishment of aliens  
348 into native communities also includes earlier stages, such as seed germination, and later  
349 stages, such as reproduction. As a recent experiment showed that the magnitude and direction  
350 of plant-soil feedback can vary across different life stages (Dudenhöffer et al. 2018), more  
351 comprehensive tests require also longer-term investigations that consider all life stages.

352 The soil that we used to create the different diversity levels came from pots in which  
353 plants were grown without competition. It could be argued that the lack of direct plant-plant  
354 interactions in the soil-conditioning phase could have biased our results. For example,  
355 competition can affect plant growth and possibly root exudation, which may change the  
356 microbial community, and thus the magnitude or even direction of plant-soil feedback in the  
357 test phase. By mixing soil trained by different species rather than directly using soil trained  
358 by communities that consist of multiple species, we removed the effect of plant competition  
359 on the microbial community. Nevertheless, our method allowed us to isolate the effect of  
360 diversity that resulted from plant-soil feedback. Still, more research is needed to identify  
361 whether and how plant competition modifies diversity effect of plant-soil feedback.

362

## 363 **Conclusions**

364 Sixty years after Elton (1958) proposed the diversity-invasibility hypothesis, mounting  
365 evidence has shown that, at the local scale, diverse communities are better at resisting  
366 invasion by alien plants. There was already evidence showing that competition is likely to

367 contribute to this relationship (Byun et al. 2013, Feng et al. 2018). However, here we show  
368 for the first time, that plant-soil feedback might also contribute to the negative diversity-  
369 invasibility relationship. An important next step would be to test the relative importance of  
370 plant-soil feedback and other processes, such as plant competition, in determining the  
371 diversity-invasibility relationship.

## 372 **Acknowledgements**

373 We thank O. Ficht, M. Fuchs, S. Gommel, E. Mamonova, V. Pasqualetto, C. Rabung, B.  
374 Rüter, H. Vahlenkamp and E. Werner for practical assistance; and X. Liu for comments on a  
375 previous version. ZZ acknowledges funding from the China Scholarship Council  
376 (201606100049) and support from the International Max Planck Research School for  
377 Organismal Biology. The authors declare no conflict of interest. YL acknowledges funding  
378 from the Chinese Academy of Sciences (Y9H1011001).

## 379 **Author contributions**

380 ZZ, YL and MvK designed the experiment. ZZ and YL performed the experiment. CB led the  
381 soil analyses. ZZ analyzed the data and led the writing with input from all others.

## 382 **Data accessibility**

383 Should the manuscript be accepted, the data supporting the results will be archived in an  
384 appropriate public repository (Dryad, Figshare or Hal) and the data DOI will be included at  
385 the end of the article.

## 386 **References**

387 Bennett, J. A., and J. Klironomos. 2019. Mechanisms of plant-soil feedback: interactions  
388 among biotic and abiotic drivers. *New Phytologist* **222**:91-96.

- 389 Bever, J. D., K. M. Westover, and J. Antonovics. 1997. Incorporating the soil community into  
390 plant population dynamics: The utility of the feedback approach. *Journal of Ecology*  
391 **85**:561-573.
- 392 Brunel, C., Y. Beifen, R. Pouteau, J. Li, and M. van Kleunen. 2019. Responses of  
393 Rhizospheric Microbial Communities of Native and Alien Plant Species to Cuscuta  
394 Parasitism. *Microbial Ecology*.
- 395 Bundesamt für Naturschutz. 2003. FloraWeb: Daten und Informationen zu Wildpflanzen und  
396 zur Vegetation Deutschlands. <http://www.floraweb.de/>.
- 397 Byers, J. E., and E. G. Noonburg. 2003. Scale dependent effects of biotic resistance to  
398 biological invasion. *Ecology* **84**:1428-1433.
- 399 Byun, C., S. de Blois, and J. Brisson. 2013. Plant functional group identity and diversity  
400 determine biotic resistance to invasion by an exotic grass. *Journal of Ecology*  
401 **101**:128-139.
- 402 Callahan, B. J., P. J. McMurdie, and S. P. Holmes. 2017. Exact sequence variants should  
403 replace operational taxonomic units in marker-gene data analysis. *The ISME Journal*  
404 **11**:2639-2643.
- 405 Callahan, B. J., P. J. McMurdie, M. J. Rosen, A. W. Han, A. J. A. Johnson, and S. P. Holmes.  
406 2016. DADA2: High-resolution sample inference from Illumina amplicon data.  
407 *Nature methods* **13**:581-583.
- 408 Cardinaux, A., S. P. Hart, and J. M. Alexander. 2018. Do soil biota influence the outcome of  
409 novel interactions between plant competitors? *Journal of Ecology* **106**:1853-1863.
- 410 Case, T. J. 1990. Invasion resistance arises in strongly interacting species-rich model  
411 competition communities. *Proceedings of the National Academy of Sciences* **87**:9610-  
412 9614.
- 413 Crawley, M. J. 1987. What makes a community invulnerable? Pages 429-451 in M. J. Crawley  
414 and P. J. Edwards, editors. *Colonization, succession and stability*, Blackwell  
415 Scientific, Oxford.
- 416 Davidson, A. M., M. Jennions, and A. B. Nicotra. 2011. Do invasive species show higher  
417 phenotypic plasticity than native species and, if so, is it adaptive? A meta-analysis.  
418 *Ecology Letters* **14**:419-431.
- 419 Dawson, W., A. Bottini, M. Fischer, M. van Kleunen, and E. Knop. 2014. Little evidence for  
420 release from herbivores as a driver of plant invasiveness from a multi-species  
421 herbivore-removal experiment. *Oikos* **123**:1509-1518.
- 422 Dawson, W., D. Moser, M. van Kleunen, H. Kreft, J. Pergl, P. Pyšek, P. Weigelt, M. Winter,  
423 B. Lenzner, T. M. Blackburn, E. E. Dyer, P. Cassey, S. L. Scrivens, E. P. Economo,  
424 B. Guénard, C. Capinha, H. Seebens, P. García-Díaz, W. Nentwig, E. García-Berthou,  
425 C. Casal, N. E. Mandrak, P. Fuller, C. Meyer, and F. Essl. 2017. Global hotspots and  
426 correlates of alien species richness across taxonomic groups. *Nature Ecology &*  
427 *Evolution* **1**:0186.
- 428 Dawson, W., M. Schrama, and A. Austin. 2016. Identifying the role of soil microbes in plant  
429 invasions. *Journal of Ecology* **104**:1211-1218.
- 430 Decaëns, T. 2010. Macroecological patterns in soil communities. *Global Ecology and*  
431 *Biogeography* **19**:287-302.
- 432 Dudenhöffer, J.-H., A. Ebeling, A.-M. Klein, and C. Wagg. 2018. Beyond biomass: Soil  
433 feedbacks are transient over plant life stages and alter fitness. *Journal of Ecology*  
434 **106**:230-241.
- 435 Elton, C. S. 1958. *The ecology of invasion by animals and plants*. Methuen, London, UK.

- 436 Feng, Y., T. D. Fouqueray, and M. van Kleunen. 2018. Linking Darwin's naturalisation  
437 hypothesis and Elton's diversity-invasibility hypothesis in experimental grassland  
438 communities. *Journal of Ecology* **0**.
- 439 Godoy, O., F. Valladares, and P. Castro-Díez. 2011. Multispecies comparison reveals that  
440 invasive and native plants differ in their traits but not in their plasticity. *Functional*  
441 *Ecology* **25**:1248-1259.
- 442 Hothorn, T., F. Bretz, and P. Westfall. 2008. Simultaneous inference in general parametric  
443 models. *Biometrical Journal* **50**:346-363.
- 444 Hudson, P. J., A. P. Dobson, and K. D. Lafferty. 2006. Is a healthy ecosystem one that is rich  
445 in parasites? *Trends in Ecology & Evolution* **21**:381-385.
- 446 Hurlbert, S. H. 1984. Pseudoreplication and the design of ecological field experiments.  
447 *Ecological Monographs* **54**:187-211.
- 448 Huston, M. A. 1997. Hidden treatments in ecological experiments: re-evaluating the  
449 ecosystem function of biodiversity. *Oecologia* **110**:449-460.
- 450 Keesing, F., R. D. Holt, and R. S. Ostfeld. 2006. Effects of species diversity on disease risk.  
451 *Ecology Letters* **9**:485-498.
- 452 Klindworth, A., E. Pruesse, T. Schweer, J. Peplies, C. Quast, M. Horn, and F. O. Glöckner.  
453 2012. Evaluation of general 16S ribosomal RNA gene PCR primers for classical and  
454 next-generation sequencing-based diversity studies. *Nucleic Acids Research* **41**:e1-e1.
- 455 Klironomos, J. N. 2002. Feedback with soil biota contributes to plant rarity and invasiveness  
456 in communities. *Nature* **417**:67-70.
- 457 Kulmatiski, A., K. H. Beard, J. R. Stevens, and S. M. Cobbold. 2008. Plant-soil feedbacks: a  
458 meta-analytical review. *Ecology Letters* **11**:980-992.
- 459 Larsson, J. J. R. p. v. 2018. eulerr: area-proportional Euler and Venn diagrams with ellipses.  
460 **3**.
- 461 Levine, J. M. 2000. Species diversity and biological invasions: Relating local process to  
462 community pattern. *Science* **288**:852-854.
- 463 Levine, J. M., P. B. Adler, and S. G. Yelenik. 2004. A meta-analysis of biotic resistance to  
464 exotic plant invasions. *Ecology Letters* **7**:975-989.
- 465 Levine, J. M., and C. M. D'Antonio. 1999. Elton revisited: a review of evidence linking  
466 diversity and invasibility. *Oikos* **87**:15-26.
- 467 Maron, J. L., and M. Vilà. 2001. When do herbivores affect plant invasion? Evidence for the  
468 natural enemies and biotic resistance hypotheses. *Oikos* **95**:361-373.
- 469 Martin, M. 2011. Cutadapt removes adapter sequences from high-throughput sequencing  
470 reads. 2011 **17**:3 %J EMBnet.journal.
- 471 Mitchell, C. E., and A. G. Power. 2003. Release of invasive plants from fungal and viral  
472 pathogens. *Nature* **421**:625.
- 473 Müller, G., M. van Kleunen, and W. Dawson. 2016. Commonness and rarity of alien and  
474 native plant species - the relative roles of intraspecific competition and plant-soil  
475 feedback. *Oikos* **125**:1458-1466.
- 476 Nguyen, N. H., Z. Song, S. T. Bates, S. Branco, L. Tedersoo, J. Menke, J. S. Schilling, and P.  
477 G. Kennedy. 2016. FUNGuild: An open annotation tool for parsing fungal community  
478 datasets by ecological guild. *Fungal Ecology* **20**:241-248.
- 479 Nilsson, R. H., K.-H. Larsson, A. F. S. Taylor, J. Bengtsson-Palme, T. S. Jeppesen, D.  
480 Schigel, P. Kennedy, K. Picard, F. O. Glöckner, L. Tedersoo, I. Saar, U. Kõljalg, and  
481 K. Abarenkov. 2018. The UNITE database for molecular identification of fungi:  
482 handling dark taxa and parallel taxonomic classifications. *Nucleic Acids Research*  
483 **47**:D259-D264.

- 484 Oksanen, J., F. G. Blanchet, M. Friendly, R. Kindt, P. Legendre, D. McGlinn, P. R. Minchin,  
485 R. B. O'Hara, G. L. Simpson, P. Solymos, M. H. H. Stevens, E. Szoecs, and H.  
486 Wagner. 2019. The vegan package.
- 487 Orgiazzi, A., E. Lumini, R. H. Nilsson, M. Girlanda, A. Vizzini, P. Bonfante, and V.  
488 Bianciotto. 2012. Unravelling Soil Fungal Communities from Different  
489 Mediterranean Land-Use Backgrounds. *Plos One* **7**:e34847.
- 490 Ostfeld, R. S., and F. Keesing. 2012. Effects of host diversity on infectious disease. *Annual*  
491 *Review of Ecology, Evolution, and Systematics* **43**:157-182.
- 492 Pinheiro, J., D. Bates, S. DebRoy, D. Sarkar, and R Core Team. 2018. Linear and nonlinear  
493 mixed effects models. R package version **3**:57.
- 494 Poorter, H., J. Böhler, D. van Dusschoten, J. Climent, and J. A. Postma. 2012. Pot size  
495 matters: a meta-analysis of the effects of rooting volume on plant growth. *Functional*  
496 *Plant Biology* **39**:839-850.
- 497 Power, A. G., and C. E. Mitchell. 2004. Pathogen spillover in disease epidemics. *American*  
498 *Naturalist* **164 Suppl 5**:S79-89.
- 499 Pyšek, P., J. Pergl, F. Essl, B. Lenzner, W. Dawson, H. Kreft, P. Weigelt, M. Winter, J.  
500 Kartesz, and M. Nishino. 2017. Naturalized alien flora of the world. *Preslia* **89**:203-  
501 274.
- 502 Quast, C., E. Pruesse, P. Yilmaz, J. Gerken, T. Schweer, P. Yarza, J. Peplies, and F. O.  
503 Glöckner. 2013. The SILVA ribosomal RNA gene database project: improved data  
504 processing and web-based tools. *Nucleic Acids Research* **41**:D590-D596.
- 505 R Core Team. 2017. *R: A language and environment for statistical computing*. R Foundation  
506 for Statistical Computing, Vienna, Austria. Available at: <http://www.R-project.org/>.
- 507 Reinhart, K. O., and M. J. Rinella. 2016. A common soil handling technique can generate  
508 incorrect estimates of soil biota effects on plants. *New Phytologist* **210**:786-789.
- 509 Richardson, D. M., P. Pyšek, M. Rejmánek, M. G. Barbour, F. D. Panetta, and C. J. West.  
510 2000. Naturalization and invasion of alien plants: concepts and definitions. *Diversity*  
511 *and Distributions* **6**:93-107.
- 512 Rinella, M. J., and K. O. Reinhart. 2018. Toward more robust plant-soil feedback research.  
513 *Ecology* **99**:550-556.
- 514 Robin, H., S. Martijn, B. Arjen, H. J. A., and B. T. Martijn. 2018. Plant community  
515 composition but not plant traits determine the outcome of soil legacy effects on plants  
516 and insects. *Journal of Ecology* **106**:1217-1229.
- 517 Schmidt, K. A., and R. S. Ostfeld. 2001. Biodiversity and the dilution effect in disease  
518 ecology. *Ecology* **82**:609-619.
- 519 Seebens, H., T. M. Blackburn, E. E. Dyer, P. Genovesi, P. E. Hulme, J. M. Jeschke, S. Pagad,  
520 P. Pyšek, M. van Kleunen, M. Winter, M. Ansong, M. Arianoutsou, S. Bacher, B.  
521 Blasius, E. G. Brockerhoff, G. Brundu, C. Capinha, C. E. Causton, L. Celesti-  
522 Grapow, W. Dawson, S. Dullinger, E. P. Economo, N. Fuentes, B. Guénard, H. Jäger,  
523 J. Kartesz, M. Kenis, I. Kühn, B. Lenzner, A. M. Liebhold, A. Mosena, D. Moser, W.  
524 Nentwig, M. Nishino, D. Pearman, J. Pergl, W. Rabitsch, J. Rojas-Sandoval, A.  
525 Roques, S. Rorke, S. Rossinelli, H. E. Roy, R. Scalera, S. Schindler, K. Štajerová, B.  
526 Tokarska-Guzik, K. Walker, D. F. Ward, T. Yamanaka, and F. Essl. 2018. Global rise  
527 in emerging alien species results from increased accessibility of new source pools.  
528 *Proceedings of the National Academy of Sciences* **115**:E2264.
- 529 van Kleunen, M., W. Dawson, O. Bossdorf, and M. Fischer. 2014. The more the merrier:  
530 Multi-species experiments in ecology. *Basic and Applied Ecology* **15**:1-9.

- 531 Zhang, Z., X. Pan, D. Blumenthal, M. van Kleunen, M. Liu, and B. Li. 2018. Contrasting  
532 effects of specialist and generalist herbivores on resistance evolution in invasive  
533 plants. *Ecology* **99**:866-875.
- 534 Zhang, Z., and M. van Kleunen. 2019. Common alien plants are more competitive than rare  
535 natives but not than common natives. *Ecology Letters* **22**:1378-1386.
- 536 Zuur, A., E. Ieno, N. Walker, A. Saveliev, and G. Smith. 2009. *Mixed effects models and*  
537 *extensions in ecology with R*. Gail M, Krickeberg K, Samet JM, Tsiatis A, Wong W,  
538 editors. New York, NY: Springer Science and Business Media.

539

540

541 **Figures**

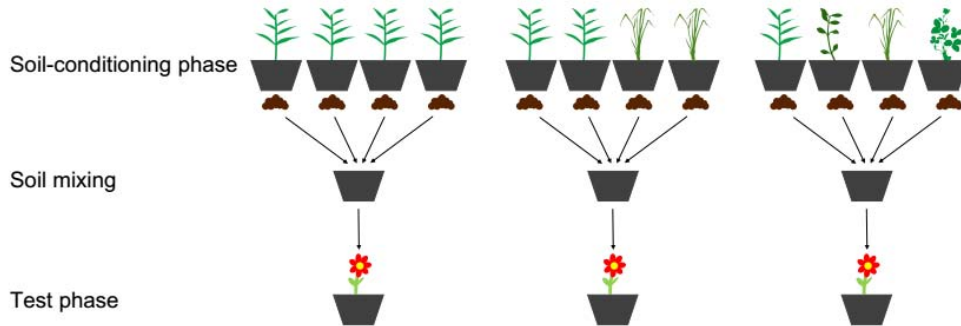

542

543 **Figure 1** Graphical illustration of the experimental design. Soil samples trained by one, two  
544 or four native species were collected from four individuals (soil-conditioning phase). Then,  
545 the soil samples were used as inoculum, and mixed with sand and vermiculite (soil mixing).  
546 In each pot, one plant of each alien species was grown (test phase). The total amount of soil  
547 used to inoculate each pot was constant. Five native species and four alien species were used  
548 in the soil-conditioning phase and test phase, respectively.

549



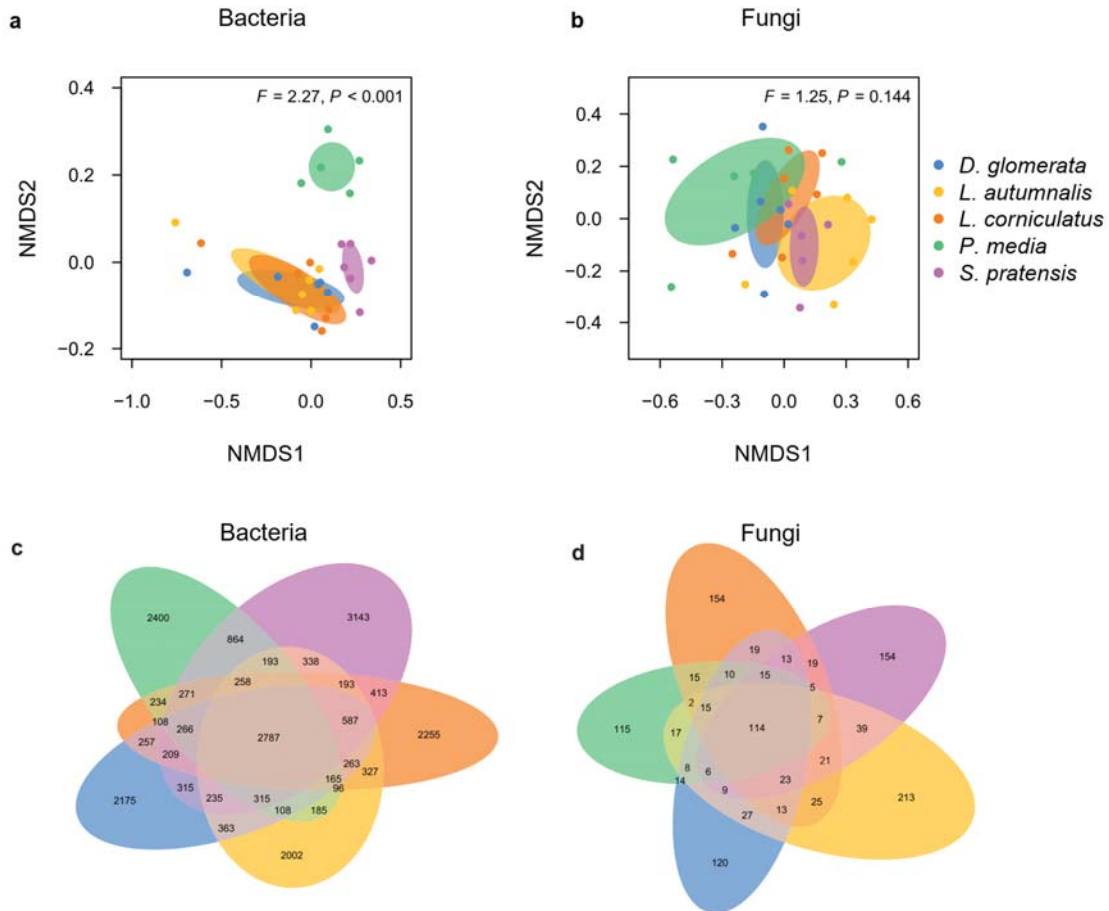

550

551 **Figure 2** Dissimilarity (beta diversity and unshared phylotypes) of bacterial (a,  
552 c) and fungal (b, d) community composition among soils trained by different  
553 native species. Different colors represent different species. In the NMDS figures  
554 (upper panel), data points represent soil samples. Ellipses represent means  $\pm 1$   
555 SDs for each native plant species.

556



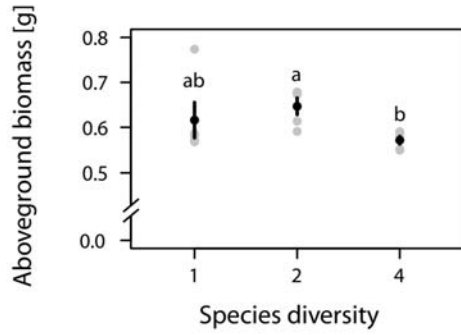

557

558 **Figure 3** Aboveground biomass (means  $\pm$  SEs) of alien plants when their pots had been  
559 inoculated with soil trained by one, two or four native species. Grey dots represent mean  
560 values of aboveground biomass of alien plants when grown on soil trained by different native  
561 species or by different native species combinations. Different letters above the error bars  
562 indicate significant differences ( $P < 0.05$ ) between different treatments based on Tukey's  
563 multiple comparison.

564
